# 1 **A meta-analysis on the role of children in SARS-CoV-2 in household transmission** 2 **clusters**

3 Yanshan Zhu<sup>1</sup>, Conor J. Bloxham<sup>2</sup>, Katina D. Hulme<sup>1</sup>, Jane E. Sinclair<sup>1</sup>, Zhen Wei Marcus  
4 Tong<sup>1</sup>, Lauren E. Steele<sup>1</sup>, Ellesandra C. Noye<sup>1</sup>, Jiahai Lu<sup>3</sup>, Yao Xia<sup>4</sup>, Keng Yih Chew<sup>1</sup>, Janessa  
5 Pickering<sup>5</sup>, Charles Gilks<sup>7,8</sup>, Asha C. Bowen<sup>5,6</sup> & Kirsty R Short<sup>1,8\*</sup>

6 <sup>1</sup>School of Chemistry and Molecular Biosciences, The University of Queensland, Brisbane  
7 Australia

8 <sup>2</sup>School of Biomedical Science, The University of Queensland, Brisbane, Australia.

9 <sup>3</sup>School of Public Health, Sun Yat-sen University, Zhongshan 2nd Road, Guangzhou 510080,  
10 Guangdong, China

11 <sup>4</sup>School of Science, Edith Cowan University, Australia; School of Biomedical Science, The  
12 University of Western Australia, Perth, Australia

13 <sup>5</sup>Wesfarmer’s Centre for Vaccines and Infectious diseases, Telethon Kids Institute, University  
14 of Western Australia, Nedlands, Perth, Western Australia

15 <sup>6</sup>Department of Infectious Diseases, Perth Children’s Hospital, Nedlands, Perth, Western  
16 Australia

17 <sup>7</sup>School of Public Health, The University of Queensland, Brisbane Australia

18 <sup>8</sup>Australian Infectious Diseases Research Centre, The University of Queensland, Brisbane,  
19 Australia.

20 \* Corresponding author

21 School of Chemistry and Molecular Biosciences, The University of Queensland, Brisbane  
22 Australia

23 Phone: +61 7 336 54226

24 Email: [k.short@uq.edu.au](mailto:k.short@uq.edu.au)

25

## 26 **Contact information for an alternate corresponding author:**

27 School of Chemistry and Molecular Biosciences, The University of Queensland, Brisbane  
28 Australia

29 Phone: +61 7 336 54226

30 Email: [yanshan.zhu@uq.net.au](mailto:yanshan.zhu@uq.net.au)

31

32 **40-word summary:** In household transmission clusters of SARS-CoV-2 children are unlikely  
33 to be the index case. Children are also less likely than adults to be infected with SARS-CoV-2  
34 from a family member.

35

36 **NOTE:** This preprint reports new research that has not been certified by peer review and should not be used to guide clinical practice.

37 **ABSTRACT**

38 The role of children in the spread of SARS-CoV-2 remains highly controversial. To address this  
39 issue, we performed a meta-analysis of the published literature on household SARS-CoV-2  
40 transmission clusters (n=213 from 12 countries). Only 8 (3.8%) transmission clusters were  
41 identified as having a paediatric index case. Asymptomatic index cases were associated with  
42 a lower secondary attack in contacts than symptomatic index cases (estimate risk ratio [RR],  
43 0.17; 95% confidence interval [CI], 0.09-0.29). To determine the susceptibility of children to  
44 household infections the secondary attack rate (SAR) in paediatric household contacts was  
45 assessed. The secondary attack rate in paediatric household contacts was lower than in adult  
46 household contacts (RR, 0.62; 95% CI, 0.42-0.91). These data have important implications for  
47 the ongoing management of the COVID-19 pandemic, including potential vaccine  
48 prioritization strategies.

49

50

51

52

53

54

55

56

57

58

59

60

## 61 INTRODUCTION

62 At the time of writing severe acute respiratory syndrome coronavirus 2 (SARS-CoV-2) has  
63 infected >50 million people resulting in >1 million deaths [1]. Large data analyses have shown  
64 that the elderly are particularly susceptible to severe forms of coronavirus disease 2019  
65 (COVID-19) [2]. However, the role of children in the transmission of SARS-CoV-2 remains  
66 controversial [3-9]. During a typical influenza virus season, children have been identified as  
67 having the highest infection rate of any age group (up to 43%). Accordingly, children may play  
68 a major role in the spread of influenza virus and are a key target population for influenza  
69 vaccination to prevent infection and reduce transmission [10]. In the context of coronaviruses,  
70 paediatric infections with SARS-CoV-1, SARS-CoV-2 and MERS are typically mild [9, 10].  
71 Nevertheless, a lower incidence of clinical symptoms raises concerns that children could be  
72 an important, undetected source of SARS-CoV-2 in transmission in the community [8, 11].  
73 Answering this question is of key importance to public health as it will help identify priority  
74 groups for vaccination. However, findings remain controversial, with some studies suggesting  
75 that children may play a key role in disease transmission and shed virus at equivalent titres to  
76 adults [12-17]. In contrast, others find little evidence of paediatric infections or spread [7, 8,  
77 18-21]. Moreover, it is unclear if SARS-CoV-2 transmission differs amongst children of  
78 differing age groups.

79

80 Studying the source and route of viral transmission from children in the community is fraught  
81 with difficulties, due to the multiple different potential sources of infection. Furthermore, it  
82 is thought that households are one of the most common settings in SARS-CoV-2 transmission  
83 [22]. Household transmission clusters therefore offer the unique opportunity to study viral  
84 transmission and susceptibility to infection in a more defined setting.

85  
86  
87  
88  
89  
90  
91  
92  
93  
94  
95  
96  
97  
98  
99  
100  
101  
102  
103  
104  
105  
106  
107  
108

To address the role of children in the transmission of SARS-CoV-2, we performed a meta-analysis on household transmission clusters. We investigated prevalence of paediatric index cases in household transmission clusters of SARS-CoV-2 as well as the secondary attack rate (SAR) of different age groups.

109 **METHODS**

110 **Definitions**

111 A household transmission cluster was defined as a group of  $\geq 2$  confirmed cases of SARS-CoV-  
112 2 infections in co-habiting individuals in whom the diagnosis of cases occurred within 2 weeks  
113 of each other. The index case was defined as the individual in the household cluster who first  
114 developed symptoms. Household contacts were defined as co-habiting individuals, typically  
115 family members, close relatives, housemates or house helpers. An individual with laboratory  
116 confirmation of SARS-CoV-2 was considered to be infected. Household secondary attack rates  
117 were defined as the proportion of confirmed infections among all household contacts. Unless  
118 otherwise stated, adults were defined as individuals  $\geq 18$  years whilst children were defined  
119 as individuals  $< 18$  years of age.

120

121 **Data collection**

122 Following the PRISMA statement for the reporting of meta-analysis [23], we searched  
123 published, de-identified, data made available between Dec 1, 2019, and August 24, 2020.  
124 Information was accessed from the World Health Organization news<sup>11</sup>, Google Scholar,  
125 PubMed, the Lancet COVID-19 resource centre<sup>12</sup>, Clinical Infectious Disease Journal and New  
126 England Journal of Medicine. We searched for databases using the search terms (“COVID-19”  
127 OR “SARS-CoV-2” OR) AND (“household transmission” OR “family cluster” OR “household  
128 contact”) AND (“transmissibility” OR “attack rate”). To identify missing studies, we checked  
129 the reference list for each selected paper. Studies that were duplicate publications, pre-prints  
130 and/or reviews were excluded (Figure 1).

131

132 Our search strategy aimed to identify all articles that assessed the prevalence of children as  
133 index cases in a family SARS-CoV-2 cluster and/or the secondary attack rate of children and  
134 adults in household transmission clusters. Depending on the level of information available,  
135 studies were included in the index case analysis or the secondary attack rate meta-analysis.

136

137 All studies included in the index case analysis were household SARS-CoV-2 transmission  
138 clusters that i) identified the index case of the cluster ii) defined the number of infected  
139 contacts in the household and iii) recorded the initial disease onset date of all cases in the  
140 cluster.

141

142 All studies included in the secondary attack rate meta-analysis were household SARS-CoV-2  
143 transmission clusters that i) defined the secondary attack rate within the cluster and ii)  
144 defined the age of contact cases in the cluster. Studies which did not meet bare minimum  
145 data required for the index case analysis nor the secondary attack rate meta-analysis were  
146 excluded (Figure 1). Where the same family cluster was included in more than published  
147 report, data was only extracted from one study. Collected data was verified by a second  
148 researcher.

149

## 150 **Statistical analysis**

151 Susceptibility to infection was estimated by calculating the secondary attack rate for  
152 household close contacts associated with the index case in each transmission cluster. We  
153 estimated the Relative Risk (RRs) for SARS CoV-2 infection stratified by the age of household  
154 contacts for each study. We then pooled these RRs using a random effects model with  
155 DerSimonian and Laird weights[24]. We used a random effects model, equalizing the weight

156 of the studies to the pooled estimate. Where relevant, we stratified the analysis by pre-  
157 specified characteristics. 95% confidence intervals (CI) were used to assess statistical  
158 significance in all models. The  $I^2$  statistic was used to evaluate heterogeneity between studies.  
159 A threshold of  $I^2 > 50\%$  was used as indicating statistically significant heterogeneity. All  
160 summary analyses and meta-analysis were performed using R statistical software (version  
161 3.6.1).

162

163

164

165

166

167

168

169

170

171

172

173

174

175

176

177

178

179

180 **RESULTS**

181 We identified 1208 articles that described SARS-CoV-2 household transmission clusters,  
182 rejected 1151 articles due to a lack of sufficient and or appropriate data and derived a total  
183 of 57 articles. Household transmission clusters were drawn from cases in 12 countries: China,  
184 Japan, France, Germany, Italy, USA, Vietnam, Malaysia, Singapore, Morocco, Greece and  
185 South Korea. 43 articles were included in the index case analysis[5, 25-66] whilst 14 articles  
186 were used in the secondary attack rate meta-analysis[66-79]. The full detail of all family  
187 clusters and characteristics of studies included in meta-analysis are shown in Supplementary  
188 Tables 1 and 2.

189

190 **Children are infrequently identified as the index case of household SARS-CoV-2 clusters**

191 In analysis of the cluster index cases, we included 43 articles, in which there were 213 SARS-  
192 CoV-2 transmission clusters and only 3.8% (8/213) were identified as having a paediatric index  
193 case (Table 1 & Supplementary Tables 1 & 3). Of 611 individuals in the 213 clusters there were  
194 102 children. These paediatric cases only caused 4.0% (16/398) of all secondary cases,  
195 compared to the 97.8% of secondary cases that occurred when an adult was identified as the  
196 index case in the cluster (Table 1).

197

198 The limited number of defined SARS-CoV-2 household clusters with children as the index case  
199 could have been influenced by the fact that COVID-19 in children is frequently asymptomatic  
200 [11]. Accordingly, it is possible that within a household cluster, children were not correctly  
201 identified as the index case of the infection (i.e. the first to develop symptoms) and were  
202 instead mistakenly identified as a contact case. To exclude this possibility, we reanalysed the  
203 data looking at household clusters where a paediatric contact case was SARS-CoV-2 positive



204 but asymptomatic. In such a scenario we assumed the child to be the ‘true’ index case of the  
205 cluster. Clusters where the asymptomatic/symptomatic status of the contact cases was not  
206 described were excluded from the analysis. Even with this broader definition, only 39 (18.5%)  
207 children were identified as the index case in the household clusters (Table 2).

208

209 It is also possible that these data were influenced by the fact that early in the SARS-CoV-2  
210 outbreak, infections were associated with travel to outbreak areas (i.e. initially to Wuhan  
211 itself and later to the entirety of Hubei). Travel is much more likely to be undertaken by an  
212 adult in the family, potentially confounding the results. To control for this factor, we reanalysed  
213 the data only including household transmission clusters where the index case had no history  
214 of travel or the whole family was associated with an outbreak area. Clusters where this  
215 information was not available were excluded from the analysis. This resulted in a total 152  
216 index cases, 32 of which (21.1%) were identified as having a child as the index case in the  
217 cluster (Table 3).

218

219 A final factor which may have confounded this analysis is the fact that in some countries a  
220 strict lockdown was imposed during the period of data collection. This would have limited the  
221 activity of children outside of the house and may therefore have artificially reduced the  
222 number of children identified as an index case. To control for this factor, a sub-analysis was  
223 performed only using data collected when the regional area or country was not in a period of  
224 ‘lockdown’. In this sub-analysis only 3.0% of clusters were associated with a paediatric index  
225 case (Table 4, Supplementary Table 1).

226

227 **Asymptomatic index cases are associated with a lower secondary attack rate**

228 We then further examined the household clusters identified in Table 1 where a child was  
229 identified as the index case in order to define the secondary attack rate of cohabiting family  
230 members (Supplementary Table 4). Clusters where the total number of infected and  
231 uninfected family members was not recorded was excluded from the analysis. Accordingly,  
232 sufficient information was only available to calculate the secondary attack rate of five clusters  
233 with a paediatric index case (mean = 46.7%; SD = 28.2%). Three of these index cases were <  
234 10 years and 3 index cases were aged 10 – 19 years. Only 22 clusters with an adult index case  
235 were eligible for this analysis (mean = 65.8%; SD = 23.3%) (Supplementary Table 5). Therefore,  
236 there was insufficient case numbers to determine whether children are more or less able to  
237 transmit SARS-CoV-2 in a household setting compared to adult index cases.

238  
239 It has previously been suggested that asymptomatic individuals may be less infectious than  
240 those who develop symptoms [7, 80, 81]. The prevalence of mild/asymptomatic infections in  
241 children may therefore affect the secondary attack rate in SARS-CoV-2 household clusters  
242 where children were identified as the index case. To assess this possibility, we examined the  
243 secondary attack rate in household clusters where the index case was symptomatic vs. the  
244 secondary attack rate in household clusters where the index case was asymptomatic, (but  
245 known to be SARS-CoV-2 positive Figure 2). Asymptomatic index cases were associated with  
246 a significantly lower secondary attack in contacts than symptomatic index cases RR = 0.17 (95%  
247 CI, 0.09-0.29), although a significant overall effect was observed with heterogeneity ( $I^2=87\%$ ,  
248  $P<0.01$ ).

249

250

251 **Children have a lower secondary attack rate than adults in household SARS-CoV-2**  
252 **transmission clusters**

253 Several studies have suggested that children are less likely than adults to be infected with  
254 SARS-CoV-2 [20, 82]. However, small scale studies can be biased by the fact that community  
255 testing is often only performed on symptomatic individuals, few of whom may be children.

256

257 We therefore used the second data set collected in this study to examine the secondary attack  
258 rate of children versus adults in household clusters where adults were identified as an index  
259 case. In 11 observational studies of household transmission clusters, the secondary attack  
260 rate in tested paediatric household contacts (<18 years old) was significantly lower than that  
261 in adult household contacts RR=0.62 (95% CI, 0.42-0.91) (Figure 3).

262

263 In a subset analysis where additional information was provided on the age of the paediatric  
264 contact, younger children (<10 years) were no more or less susceptible to infection compared  
265 to older children (>10 years) RR = 0.69 (95% CI, 0.26-1.82) with no significant heterogeneity  
266 ( $I^2=33\%$ ,  $P=0.17$ , Figure 4). Together, these data suggest that children (<18 years old) are less  
267 susceptible to SARS-CoV-2 infection in a household transmission cluster.

268

269

270

271

272

273

274

275 **DISCUSSION**

276 The transmission of SARS-CoV-2 to and from children has remained controversial throughout  
277 the course of the COVID-19 pandemic. In the present study, we only recorded a limited  
278 number of household transmission clusters (3.8%) where children (<18 years) were identified  
279 as the index case. This observation is supported by previous study from China, where a study  
280 of 66 family transmission clusters showed that children were never the first in the family to  
281 be diagnosed with COVID-19 [83]. Other reviews have also found limited evidence of children  
282 as the index case in household transmission clusters [4, 20]. Indeed, in a family based study  
283 by the Dutch National Institute for Public Health and the Environment there were no  
284 indications in any of the 54 participating families that a child <12 years old was the source of  
285 COVID-19 within the family[84]. A more recent study of households in Tennessee and  
286 Wisconsin suggested that of 101 family SARS-CoV-2 clusters, only 14 had paediatric index  
287 cases [85].

288

289 There are multiple possible reasons as to why children may be infrequently identified as the  
290 index case in household transmission clusters. This may reflect limited interaction of children  
291 outside the home during the period in question or the higher probably of an adult traveling  
292 to a COVID-19 endemic area than a child (. An alternate hypothesis is that children are less  
293 susceptible to SARS-CoV-2 infection than adults. Indeed, this is consistent with our  
294 observation that in household transmission clusters, children were significantly less likely to  
295 acquire SARS-CoV-2 than their adult family members. Interestingly, we found that older  
296 children were not significantly more likely than younger children to acquire the virus, in  
297 contrast to previous pre-print suggestions [4].

298

299 A reduced incidence of SARS-CoV-2 infection in children outside the home has previously  
300 been reported [2, 4, 8, 18]. [86]. [87]. Indeed, these data are congruent with survey data from  
301 Vo', Italy [88]. Here, all age groups were homogenously sampled yet no children tested  
302 positive for SARS-CoV-2 infection. This was despite the fact that at least 13 of these children  
303 lived together with infected family members [88].

304

305 Once infected, it remains to be determined as to whether children are more or less likely to  
306 transmit the SARS-CoV-2 to a family member as an infected adult. Whilst the mean number  
307 of infected household members was lower when a child was identified as the index case of  
308 the cluster, the low number of clusters eligible for inclusion in this analysis precluded any  
309 definitive conclusions. However, these data are consistent with recent U.S. data suggesting  
310 that the SAR from paediatric index cases (18 years old) was less than that of adults (43% and  
311 57% respectively) [86]. It has previously been suggested that children are less likely to  
312 transmit SARS-CoV-2 compared to adults [7, 8, 18-20]. Such suggestions have remained  
313 controversial amongst other findings that children have equivalent nasopharyngeal viral loads  
314 to adults [14, 16, 17]. However, reanalysis of the aforementioned studies have shown that i)  
315 young children (<10 years old) did indeed have a significantly lower viral load [19] ii) that the  
316 comparison was being performed between children in the first 2 days of symptoms and  
317 hospitalized adults with severe disease[17] and iii) datasets included few children younger  
318 than 16 years[16]. Similarly, pre-print suggestions that the risk of SARS-CoV-2 transmission to  
319 contacts is greatest from infected individuals <14 years old may be affected by limited case  
320 numbers in this age group (14/1489 total cases)[12].

321

322 Should children be less likely to transmit the virus, it is interesting to speculate the possible  
323 mechanism by which this occurs. There is an emerging body of evidence that mild or  
324 asymptomatic patients are less infectious than those with pronounced clinical symptoms [7,  
325 13, 80, 81, 89]. Indeed, our meta-analysis showed that an asymptomatic index case was  
326 associated with a significantly lower secondary attack rate compared to a symptomatic index  
327 case. It is therefore tempting to hypothesise that children may be less infectious than adults  
328 infected with SARS-CoV-2 due to their more mild clinical manifestation of disease. However,  
329 such a hypothesis requires validation across a larger and more diverse dataset.

330

331 The present study was subject to several important limitations. Firstly, as we were  
332 conservative during the data collection only a limited number of studies were included,  
333 potentially contributing to the high I2 value observed. This study also assumes that SARS-CoV-  
334 2 infections in the household contacts of infected individual were the result of a direct  
335 transmission event. However, it is possible that the household contact acquired the virus from  
336 another source (e.g. from community exposure) and that the first in the family to develop  
337 symptoms was not necessarily the index case. We were also unable to control for the chance  
338 of a 'common exposure' where two individuals were infected by the same source at the same  
339 time, but one individual was incorrectly identified as the sole index case of the cluster as they  
340 were the first to develop symptoms. Indeed, this appears to have confounded the analysis of  
341 a series of family clusters identified in South Korea [5, 15]. It is also important to note that we  
342 were unable to differentiate between pre-symptomatic and asymptomatic infections and  
343 therefore the number of identified asymptotically infected individuals may be  
344 overestimated. Finally, it is important to note that these data should not be extrapolated to  
345 SARS-CoV-2 transmission outside the home where children tend to make more social contacts

346 than adults[18]. This could significantly influence transmission dynamics in the community  
347 setting, although our data are congruent with the low rate of SARS-CoV-2 transmission in  
348 Australian schools [90].

349

350 We are almost one year into the COVID-19 pandemic and many countries are still struggling  
351 to control outbreaks of SARS-CoV-2. At the time of writing, numerous countries in Europe  
352 have been forced into a second lockdown. However, unlike the first lockdown many countries  
353 (including the U.K. and Germany) have elected to keep schools open. The data presented in  
354 this manuscript suggest that should children become infected at school during this period,  
355 they are unlikely to spread SARS-CoV-2 to their co-habiting family members.

356

357 There is now a growing body of evidence that a safe and at least partially effective vaccine  
358 will be soon licenced for human use. However, due to the global demands, SARS-CoV-2  
359 vaccines are likely to be first administered to pre-defined priority populations. Whilst  
360 prioritising the vaccination children against influenza has proved an effective tool in the  
361 reducing the spread of influenza virus in the community[10], our data suggest that a similar  
362 strategy would be unlikely to significantly decrease the household transmission of SARS-CoV-  
363 2.

364

365

366

367

368

369

## 370 REFERENCES

- 371 1. Worldometer. Coronavirus Update (Live). <https://www.worldometersinfo/coronavirus/>: Date  
372 accessed: 1 September 2020.
- 373 2. Surveillances V. The epidemiological characteristics of an outbreak of 2019 novel  
374 coronavirus diseases (COVID-19)—China, 2020. *China CDC Weekly* **2020**; 2(8): 113-22.
- 375 3. García-Salido A. SARS-CoV-2 children transmission: The evidence is that today we do not  
376 have enough evidence. *Acta Paediatr* **2020**; 109(9): 1912.
- 377 4. Goldstein E, Lipsitch M, Cevik M. On the effect of age on the transmission of SARS-CoV-2 in  
378 households, schools and the community. *medRxiv* **2020**.
- 379 5. Kim J, Choe YJ, Lee J, et al. Role of children in household transmission of COVID-19. *Archives*  
380 *of disease in childhood* **2020**.
- 381 6. Lau MS, Grenfell B, Thomas M, Bryan M, Nelson K, Lopman B. Characterizing superspreading  
382 events and age-specific infectiousness of SARS-CoV-2 transmission in Georgia, USA.  
383 *Proceedings of the National Academy of Sciences* **2020**; 117(36): 22430-5.
- 384 7. Lee B, Raszka WV. COVID-19 transmission and children: the child is not to blame. *Pediatrics*  
385 **2020**; 146(2).
- 386 8. Stockholm. COVID-19 in children and the role of school settings in COVID-19 transmission.  
387 *ECDC* **2020**; 6 August
- 388 9. Szablewski CM, Chang KT, Brown MM, et al. SARS-CoV-2 transmission and infection among  
389 attendees of an overnight camp—Georgia, June 2020. *Morbidity and Mortality Weekly*  
390 *Report* **2020**; 69(31): 1023.
- 391 10. Weycker D, Edelsberg J, Halloran ME, et al. Population-wide benefits of routine vaccination  
392 of children against influenza. *Vaccine* **2005**; 23(10): 1284-93.
- 393 11. Kelvin AA, Halperin S. COVID-19 in children: the link in the transmission chain. *The Lancet*  
394 *Infectious Diseases* **2020**.
- 395 12. Fateh-Moghadam P, Battisti L, Molinaro S, et al. Contact tracing during Phase I of the COVID-  
396 19 pandemic in the Province of Trento, Italy: key findings and recommendations. *medRxiv*  
397 **2020**.
- 398 13. Heald-Sargent T, Muller WJ, Zheng X, Rippe J, Patel AB, Kocielek LK. Age-related differences  
399 in nasopharyngeal severe acute respiratory syndrome coronavirus 2 (SARS-CoV-2) levels in  
400 patients with mild to moderate coronavirus disease 2019 (COVID-19). *JAMA pediatrics* **2020**;  
401 174(9): 902-3.
- 402 14. Jones TC, Mühlemann B, Veith T, et al. An analysis of SARS-CoV-2 viral load by patient age.  
403 *medRxiv* **2020**.
- 404 15. Park YJ, Choe YJ, Park O, et al. Contact tracing during coronavirus disease outbreak, South  
405 Korea, 2020. *Emerging infectious diseases* **2020**; 26(10): 2465-8.
- 406 16. Singanayagam A, Patel M, Charlett A, et al. Duration of infectiousness and correlation with  
407 RT-PCR cycle threshold values in cases of COVID-19, England, January to May 2020.  
408 *Eurosurveillance* **2020**; 25(32): 2001483.
- 409 17. Yonker LM, Neilan AM, Bartsch Y, et al. Pediatric severe acute respiratory syndrome  
410 coronavirus 2 (SARS-CoV-2): clinical presentation, infectivity, and immune responses. *The*  
411 *Journal of pediatrics* **2020**.
- 412 18. Davies NG, Klepac P, Liu Y, et al. Age-dependent effects in the transmission and control of  
413 COVID-19 epidemics. *Nature Medicine* **2020**; 26(8): 1205-11.
- 414 19. Li X, Xu W, Dozier M, He Y, Kirolos A, Theodoratou E. The role of children in transmission of  
415 SARS-CoV-2: a rapid review. *Journal of global health* **2020**; 10(1).
- 416 20. Ludvigsson JF. Children are unlikely to be the main drivers of the COVID-19 pandemic—a  
417 systematic review. *Acta Paediatrica* **2020**.
- 418 21. Surveillance NCFIRa. COVID-19 in schools and early childhood education and care services –  
419 the Term 3 experience in NSW <https://www.ncirs.org.au/sites/default/files/2020-10/COVID->



- 420 [19%20Transmission%20in%20educational%20settings%20in%20NSW%20Term%203%20rep](#)  
421 [ort\\_Opdf](#) **2020**; ( Date accessed: 1 November 2020.).
- 422 22. Lewis NM, Chu VT, Ye D, et al. Household transmission of SARS-CoV-2 in the United States.  
423 *Clinical Infectious Diseases* **2020**.
- 424 23. Moher D, Liberati A, Tetzlaff J, Altman DG, Group P. Preferred reporting items for systematic  
425 reviews and meta-analyses: the PRISMA statement. *PLoS med* **2009**; 6(7): e1000097.
- 426 24. DerSimonian R, Laird N. Meta-analysis in clinical trials. *Controlled clinical trials* **1986**; 7(3):  
427 177-88.
- 428 25. Xu Y, Xiao M, Liu X, et al. Significance of serology testing to assist timely diagnosis of SARS-  
429 CoV-2 infections: implication from a family cluster. *Emerging Microbes & Infections* **2020**;  
430 9(1): 924-7.
- 431 26. Tong Z-D, Tang A, Li K-F, et al. Potential presymptomatic transmission of SARS-CoV-2,  
432 Zhejiang province, China, 2020. *Emerging infectious diseases* **2020**; 26(5): 1052.
- 433 27. Li C, Ji F, Wang L, et al. Asymptomatic and human-to-human transmission of SARS-CoV-2 in a  
434 2-family cluster, Xuzhou, China. *Emerging infectious diseases* **2020**; 26(7): 1626.
- 435 28. Lu J, Gu J, Li K, et al. COVID-19 outbreak associated with air conditioning in restaurant,  
436 Guangzhou, China, 2020. *Emerging infectious diseases* **2020**; 26(7): 1628.
- 437 29. Liu Y-C, Liao C-H, Chang C-F, Chou C-C, Lin Y-R. A locally transmitted case of SARS-CoV-2  
438 infection in Taiwan. *New England Journal of Medicine* **2020**; 382(11): 1070-2.
- 439 30. Ye F, Xu S, Rong Z, et al. Delivery of infection from asymptomatic carriers of COVID-19 in a  
440 familial cluster. *International Journal of Infectious Diseases* **2020**.
- 441 31. Kong I, Park Y, Woo Y, et al. Early epidemiological and clinical characteristics of 28 cases of  
442 coronavirus disease in South Korea. *Osong Public Health Res Perspect* **2020**; 11(1): 8-14.
- 443 32. Song R, Han B, Song M, et al. Clinical and epidemiological features of COVID-19 family  
444 clusters in Beijing, China. *Journal of Infection* **2020**.
- 445 33. Lin J, Duan J, Tan T, Fu Z, Dai J. The isolation period should be longer: lesson from a child  
446 infected with SARS-CoV-2 in Chongqing, China. *Pediatric pulmonology* **2020**; 55(6): E6-E9.
- 447 34. Jiang X-L, Zhang X-L, Zhao X-N, et al. Transmission Potential of Asymptomatic and  
448 Paucisymptomatic Severe Acute Respiratory Syndrome Coronavirus 2 Infections: A 3-Family  
449 Cluster Study in China. *The Journal of Infectious Diseases* **2020**; 221(12): 1948-52.
- 450 35. Cao G, Tang S, Yang D, et al. The potential transmission of SARS-CoV-2 from patients with  
451 negative RT-PCR swab tests to others: two related clusters of COVID-19 outbreak. *Japanese*  
452 *Journal of Infectious Diseases* **2020**: JJID. 2020.165.
- 453 36. Yang M-C, Hung P-P, Wu Y-K, Peng M-Y, Chao Y-C, Su W-L. A three-generation family cluster  
454 with COVID-19 infection: Should quarantine be prolonged? *Public Health* **2020**.
- 455 37. Jiang Y, Niu W, Wang Q, Zhao H, Meng L, Zhang C. Characteristics of a family cluster of  
456 Severe Acute Respiratory Syndrome Coronavirus 2 in Henan, China. *The Journal of Infection*  
457 **2020**.
- 458 38. Mao L-j, Xu J, Xu Z-h, et al. A child with household transmitted COVID-19. *BMC Infectious*  
459 *Diseases* **2020**; 20: 1-5.
- 460 39. Chen M, Fan P, Liu Z, et al. A SARS-CoV-2 familial cluster infection reveals asymptomatic  
461 transmission to children. *Journal of Infection and Public Health* **2020**.
- 462 40. An P, Zhang M. Novel coronavirus SARS-CoV-2: familial spread resulting in COVID-19  
463 pneumonia in a pediatric patient. *Diagnostic and Interventional Radiology* **2020**; 26(3): 262.
- 464 41. Phan LT, Nguyen TV, Huynh LK, et al. Clinical features, isolation, and complete genome  
465 sequence of severe acute respiratory syndrome coronavirus 2 from the first two patients in  
466 Vietnam. *Journal of Medical Virology* **2020**.
- 467 42. Chen S, Yin Q, Shi H, et al. A familial cluster, including a kidney transplant recipient, of  
468 Coronavirus Disease 2019 (COVID-19) in Wuhan, China. *American Journal of Transplantation*  
469 **2020**.

- 470 43. Wei WE, Li Z, Chiew CJ, Yong SE, Toh MP, Lee VJ. Presymptomatic Transmission of SARS-CoV-  
471 2—Singapore, January 23–March 16, 2020. *Morbidity and Mortality Weekly Report* **2020**;  
472 69(14): 411.
- 473 44. Qian G, Yang N, Ma AHY, et al. COVID-19 transmission within a family cluster by  
474 presymptomatic carriers in China. *Clinical Infectious Diseases* **2020**.
- 475 45. Huang L, Zhang X, Zhang X, et al. Rapid asymptomatic transmission of COVID-19 during the  
476 incubation period demonstrating strong infectivity in a cluster of youngsters aged 16-23  
477 years outside Wuhan and characteristics of young patients with COVID-19: a prospective  
478 contact-tracing study. *Journal of Infection* **2020**.
- 479 46. Prazuck T, Giaché S, Gubavu C, et al. Investigation of a family outbreak of COVID-19 using  
480 systematic rapid diagnostic tests raises new questions about transmission. *The Journal of*  
481 *infection* **2020**.
- 482 47. Antinori S, Torre A, Antinori C, et al. SARS-COV-2 infection: Across the border into the family.  
483 *Travel Medicine and Infectious Disease* **2020**.
- 484 48. Xiong Y, Song S, Ye G, Wang X. Family cluster of three recovered cases of pneumonia due to  
485 severe acute respiratory syndrome coronavirus 2 infection. *BMJ Case Reports CP* **2020**;  
486 13(5): e235302.
- 487 49. Li P, Fu J-B, Li K-F, et al. Transmission of COVID-19 in the terminal stages of the incubation  
488 period: A familial cluster. *International Journal of Infectious Diseases* **2020**; 96: 452-3.
- 489 50. Wolf GK, Glueck T, Huebner J, et al. Clinical and Epidemiological Features of a Family Cluster  
490 of Symptomatic and Asymptomatic SARS-CoV-2 Infection. *Journal of the Pediatric Infectious*  
491 *Diseases Society* **2020**.
- 492 51. Nassih H, El Fakiri K, Sab IA. Absence of Evidence of Transmission of Coronavirus Disease  
493 2019 from a Young Child to Mother Despite Prolonged Contact. *The Indian Journal of*  
494 *Pediatrics* **2020**: 1-.
- 495 52. Le HT, Nguyen LV, Tran DM, et al. The first infant case of COVID-19 acquired from a  
496 secondary transmission in Vietnam. *The Lancet Child & Adolescent Health* **2020**; 4(5): 405-6.
- 497 53. Lowe A, Chang DD, Creek G. Multiple Fatalities in a Family Cluster of COVID-19 With Acute  
498 Respiratory Distress Syndrome. *Ochsner Journal* **2020**; 20(2): 134-8.
- 499 54. Li J, Ding J, Chen L, et al. Epidemiological and clinical characteristics of three family clusters  
500 of COVID-19 transmitted by latent patients in China. *Epidemiology & Infection* **2020**; 148.
- 501 55. Pan X, Chen D, Xia Y, et al. Asymptomatic cases in a family cluster with SARS-CoV-2 infection.  
502 *The Lancet Infectious Diseases* **2020**; 20(4): 410-1.
- 503 56. Chan JF-W, Yuan S, Kok K-H, et al. A familial cluster of pneumonia associated with the 2019  
504 novel coronavirus indicating person-to-person transmission: a study of a family cluster. *The*  
505 *Lancet* **2020**; 395(10223): 514-23.
- 506 57. Guan W-j, Ni Z-y, Hu Y, et al. Clinical characteristics of coronavirus disease 2019 in China.  
507 *New England journal of medicine* **2020**; 382(18): 1708-20.
- 508 58. Ghinai I, McPherson TD, Hunter JC, et al. First known person-to-person transmission of  
509 severe acute respiratory syndrome coronavirus 2 (SARS-CoV-2) in the USA. *The Lancet* **2020**.
- 510 59. Thanh HN, Van TN, Thu HNT, et al. Outbreak investigation for COVID-19 in northern  
511 Vietnam. *The Lancet Infectious Diseases* **2020**; 20(5): 535-6.
- 512 60. Park JY, Han MS, Park KU, Kim JY, Choi EH. First pediatric case of coronavirus disease 2019 in  
513 Korea. *Journal of Korean medical science* **2020**; 35(11).
- 514 61. Kam K-q, Yung CF, Cui L, et al. A well infant with coronavirus disease 2019 with high viral  
515 load. *Clinical Infectious Diseases* **2020**.
- 516 62. Zhang J, Tian S, Lou J, Chen Y. Familial cluster of COVID-19 infection from an asymptomatic.  
517 *Critical Care* **2020**; 24: 1-3.
- 518 63. Bai Y, Yao L, Wei T, et al. Presumed asymptomatic carrier transmission of COVID-19. *Jama*  
519 **2020**; 323(14): 1406-7.

- 520 64. Hu Z, Song C, Xu C, et al. Clinical characteristics of 24 asymptomatic infections with COVID-19  
521 screened among close contacts in Nanjing, China. *Science China Life Sciences* **2020**; 63(5):  
522 706-11.
- 523 65. He X, Lau EH, Wu P, et al. Temporal dynamics in viral shedding and transmissibility of COVID-  
524 19. *Nature medicine* **2020**; 26(5): 672-5.
- 525 66. Maltezou HC, Vorou R, Papadima K, et al. Transmission dynamics of SARS-CoV-2 within  
526 families with children in Greece: A study of 23 clusters. *Journal of medical virology* **2020**.
- 527 67. Chaw L, Koh WC, Jamaludin SA, Naing L, Alikhan MF, Wong J. Analysis of SARS-CoV-2  
528 transmission in different settings, Brunei. *Emerging infectious diseases* **2020**; 26(11): 2598.
- 529 68. Park SY, Kim Y-M, Yi S, et al. Early Release-Coronavirus Disease Outbreak in Call Center,  
530 South Korea. *Emerging Infectious Diseases* **2020**.
- 531 69. Wu J, Huang Y, Tu C, et al. Household Transmission of SARS-CoV-2, Zhuhai, China, 2020.  
532 *Clinical Infectious Diseases* **2020**.
- 533 70. Wang Y, Tian H, Zhang L, et al. Reduction of secondary transmission of SARS-CoV-2 in  
534 households by face mask use, disinfection and social distancing: a cohort study in Beijing,  
535 China. *BMJ Global Health* **2020**; 5(5): e002794.
- 536 71. Somekh E, Gleyzer A, Heller E, et al. The role of children in the dynamics of intra family  
537 coronavirus 2019 spread in densely populated area. *The Pediatric infectious disease journal*  
538 **2020**; 39(8): e202-e4.
- 539 72. Yousaf AR, Duca LM, Chu V, et al. A prospective cohort study in non-hospitalized household  
540 contacts with SARS-CoV-2 infection: symptom profiles and symptom change over time.  
541 *Clinical Infectious Diseases* **2020**.
- 542 73. Bi Q, Wu Y, Mei S, et al. Epidemiology and transmission of COVID-19 in 391 cases and 1286  
543 of their close contacts in Shenzhen, China: a retrospective cohort study. *The Lancet*  
544 *Infectious Diseases* **2020**.
- 545 74. Hua CZ, Miao ZP, Zheng JS, et al. Epidemiological features and viral shedding in children with  
546 SARS-CoV-2 infection. *Journal of medical virology* **2020**; 92(11): 2804-12.
- 547 75. Jing Q-L, Liu M-J, Zhang Z-B, et al. Household secondary attack rate of COVID-19 and  
548 associated determinants in Guangzhou, China: a retrospective cohort study. *The Lancet*  
549 *Infectious Diseases* **2020**; 20(10): 1141-50.
- 550 76. Li W, Zhang B, Lu J, et al. The characteristics of household transmission of COVID-19. *Clinical*  
551 *Infectious Diseases* **2020**.
- 552 77. Cheng H-Y, Jian S-W, Liu D-P, et al. Contact Tracing Assessment of COVID-19 Transmission  
553 Dynamics in Taiwan and Risk at Different Exposure Periods Before and After Symptom  
554 Onset. *JAMA Internal Medicine* **2020**; 180(9): 1156-63.
- 555 78. Rosenberg ES, Dufort EM, Blog DS, et al. COVID-19 testing, epidemic features, hospital  
556 outcomes, and household prevalence, New York State—March 2020. *Clinical Infectious*  
557 *Diseases* **2020**.
- 558 79. Yung CF, Kam K-Q, Chong CY, et al. Household transmission of severe acute respiratory  
559 syndrome coronavirus 2 from adults to children. *The Journal of pediatrics* **2020**; 225: 249-51.
- 560 80. Cevik M, Tate M, Lloyd O, Maraolo AE, Schafers J, Ho A. SARS-CoV-2, SARS-CoV, and MERS-  
561 CoV viral load dynamics, duration of viral shedding, and infectiousness: a systematic review  
562 and meta-analysis. *The Lancet Microbe* **2020**.
- 563 81. Luo L, Liu D, Liao X, et al. Contact settings and risk for transmission in 3410 close contacts of  
564 patients with COVID-19 in Guangzhou, China: a prospective cohort study. *Annals of internal*  
565 *medicine* **2020**.
- 566 82. Xie Z. Pay attention to SARS-CoV-2 infection in children. *Pediatric Investigation* **2020**; 4(1): 1-  
567 4.
- 568 83. Ma H, Hu J, Tian J, et al. Visualizing the Novel Coronavirus (COVID-19) in Children: What We  
569 Learn from Patients at Wuhan Children's Hospital. Available at SSRN 3556676 **2020**.

- 570 84. Environment NIFPHat. Children, school and COVID-19. [https://www.rivm.nl/en/novel-](https://www.rivm.nl/en/novel-coronavirus-covid-19/children-and-covid-19)  
571 [coronavirus-covid-19/children-and-covid-19](https://www.rivm.nl/en/novel-coronavirus-covid-19/children-and-covid-19) **2020**: Date accessed: 23 November 2020.
- 572 85. Grijalva CG, Rolfes MA, Zhu Y, et al. Transmission of SARS-CoV-2 infections in households—  
573 Tennessee and Wisconsin, April–September 2020. *Morbidity and Mortality Weekly Report*  
574 **2020**; 69(44): 1631.
- 575 86. Hippich M, Holthaus L, Assfalg R, et al. Public health antibody screening indicates a six-fold  
576 higher SARS-CoV-2 exposure rate than reported cases in children. *Med* **2020**.
- 577 87. Gudbjartsson DF, Helgason A, Jonsson H, et al. Spread of SARS-CoV-2 in the Icelandic  
578 population. *New England Journal of Medicine* **2020**.
- 579 88. Lavezzo E, Franchin E, Ciavarella C, et al. Suppression of a SARS-CoV-2 outbreak in the Italian  
580 municipality of Vo'. *Nature* **2020**; 584(7821): 425-9.
- 581 89. Luo L, Liu D, Liao X-l, et al. Modes of contact and risk of transmission in COVID-19 among  
582 close contacts. *medRxiv* **2020**.
- 583 90. Macartney K, Quinn HE, Pillsbury AJ, et al. Transmission of SARS-CoV-2 in Australian  
584 educational settings: a prospective cohort study. *The Lancet Child & Adolescent Health*  
585 **2020**; 4(11): 807-16.

586

587

588

589

590

591

592

593

594

595

596

597

598

599

600

601

602

603 **ACKNOWLEDGEMENTS:**

604 KRS was supported by the Australian Research Council [DE180100512]. ACB  
605 receives funding from the National Health and Medical Research Council with an Investigator  
606 Award (1175509).

607

608

609

610

611

612

613

614

615

616

617

618

619

620

621

622

623

624

625

626

627

628 **Table 1. Household transmission clusters of SARS-CoV-2 stratified by the age of the**  
629 **index case**

| Characteristics         | SARS-CoV-2 household transmission cases |                                  |
|-------------------------|-----------------------------------------|----------------------------------|
|                         | Cluster (n=213),<br>No. (%)             | Secondary cases (n=398), No. (%) |
| Child as the index case | 8 (3.8)                                 | 16 (4.0)                         |
| Adult as the index case | 205 (96.2)                              | 382 (96.0)                       |

630

631 **Table 2. Household transmission clusters of SARS-CoV-2 where any asymptomatic,**  
632 **SARS-CoV-2 positive children are assumed to be the index case of the cluster**

| Characteristics                                                 | SARS-CoV-2 household transmission cases |                                  |
|-----------------------------------------------------------------|-----------------------------------------|----------------------------------|
|                                                                 | Cluster (n=211), No. (%)                | Secondary cases (n=395), No. (%) |
| Child as the index case<br>(including asymptomatic<br>children) | 39 (18.5)                               | 80 (21.7)                        |
| Adult as the index case                                         | 172 (81.5)                              | 315 (79.7)                       |

633

634 **Table 3. Household transmission clusters of SARS-CoV-2 accounting for the travel of**  
635 **adults to outbreak areas**

| Characteristics         | SARS-CoV-2 household transmission cases |                                     |
|-------------------------|-----------------------------------------|-------------------------------------|
|                         | Cluster (n=152),<br>No. (%)             | Secondary cases (n=264),<br>No. (%) |
| Child as the index case | 32 (21.1)                               | 68 (25.8)                           |
| Adult as the index case | 120 (78.9)                              | 196 (74.2)                          |

636

637 **Table 4. Household transmission clusters of SARS-CoV-2 in the absence of regional or**  
638 **national ‘lockdown’**

639

| Characteristics         | SARS-CoV-2 household transmission cases |                                     |
|-------------------------|-----------------------------------------|-------------------------------------|
|                         | Cluster (n=199),<br>No. (%)             | Secondary cases (n=366),<br>No. (%) |
| Child as the index case | 6 (3.0)                                 | 12 (3.3)                            |
| Adult as the index case | 193 (97.0)                              | 354 (96.7)                          |

640

641

642

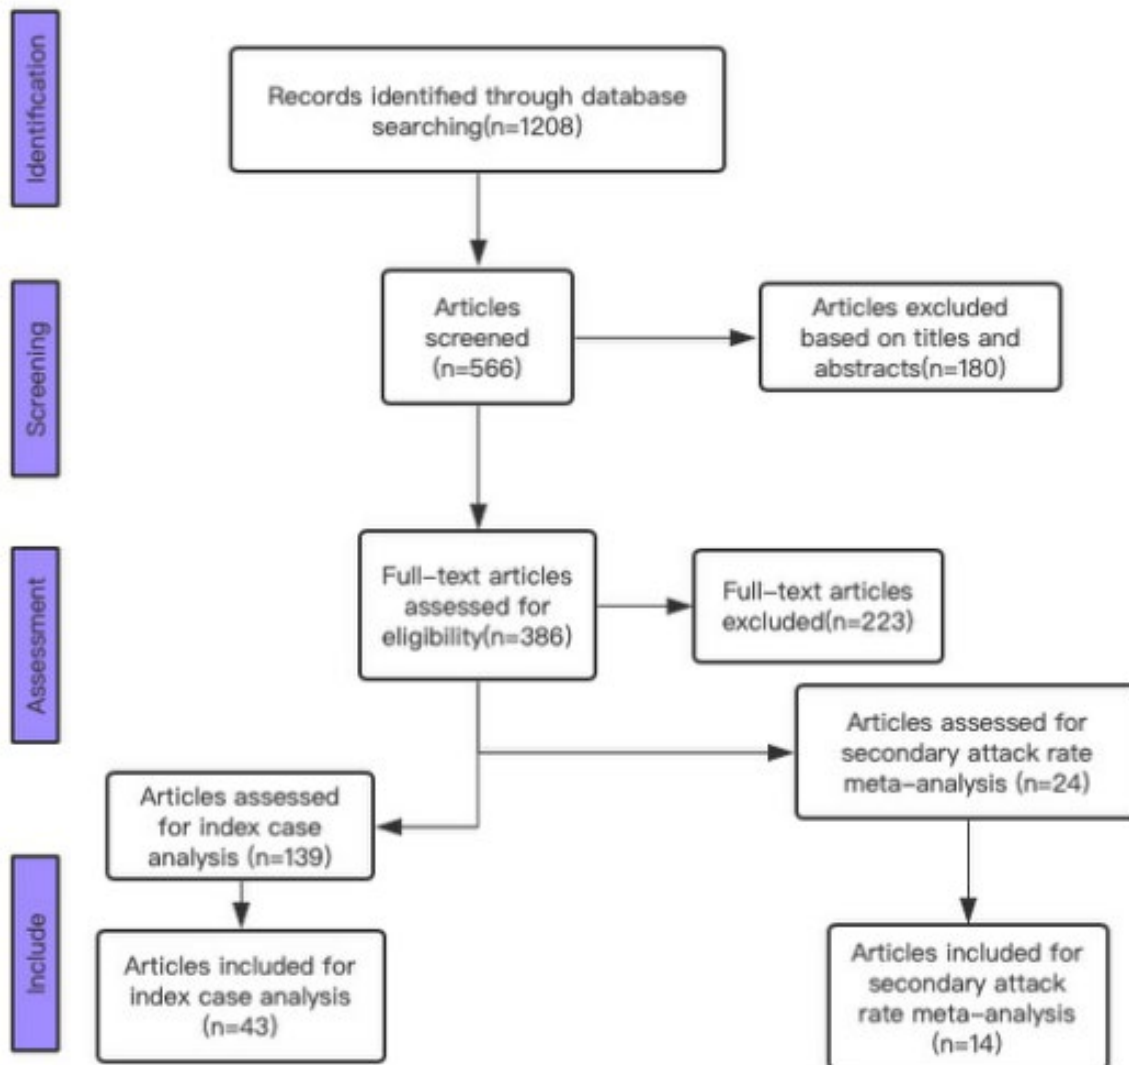

643

644 **Figure 1. Preferred Reporting Items for Systematic Reviews and Meta-analysis**  
645 **(PRISMA) flow diagram.**

646

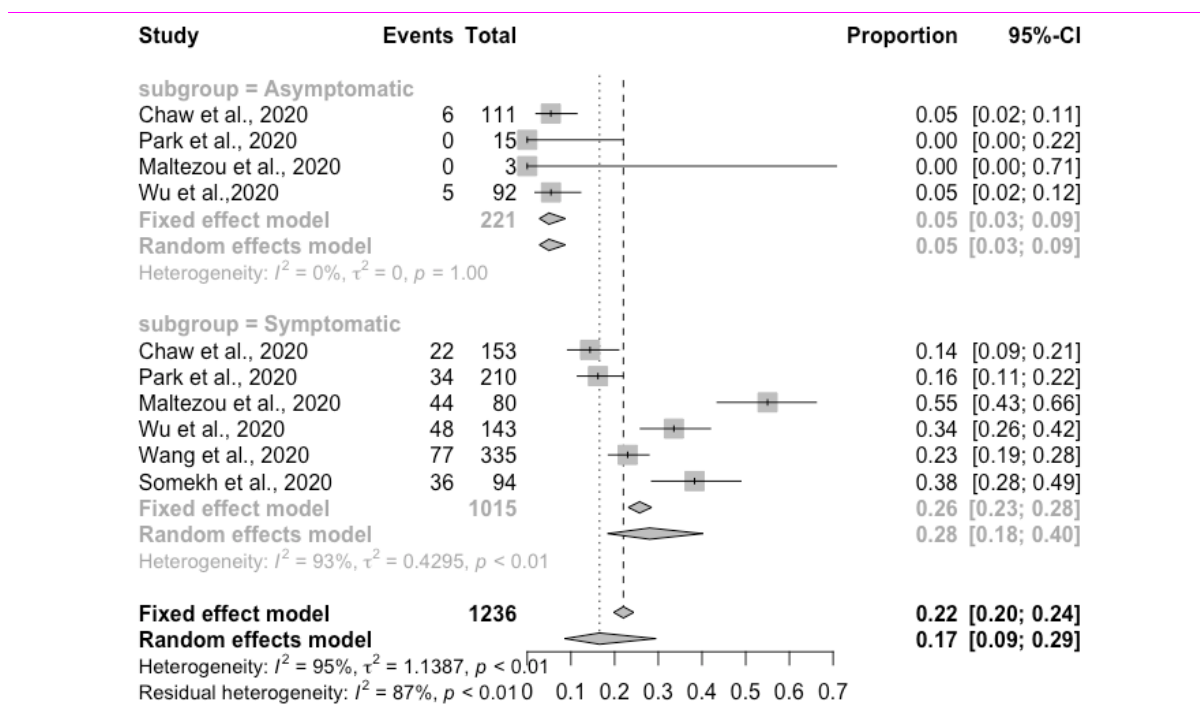

647

648 **Figure 2. The secondary attack rate of household transmission stratified by SARS-CoV-**  
 649 **2 positive symptomatic and asymptomatic index cases.**

650

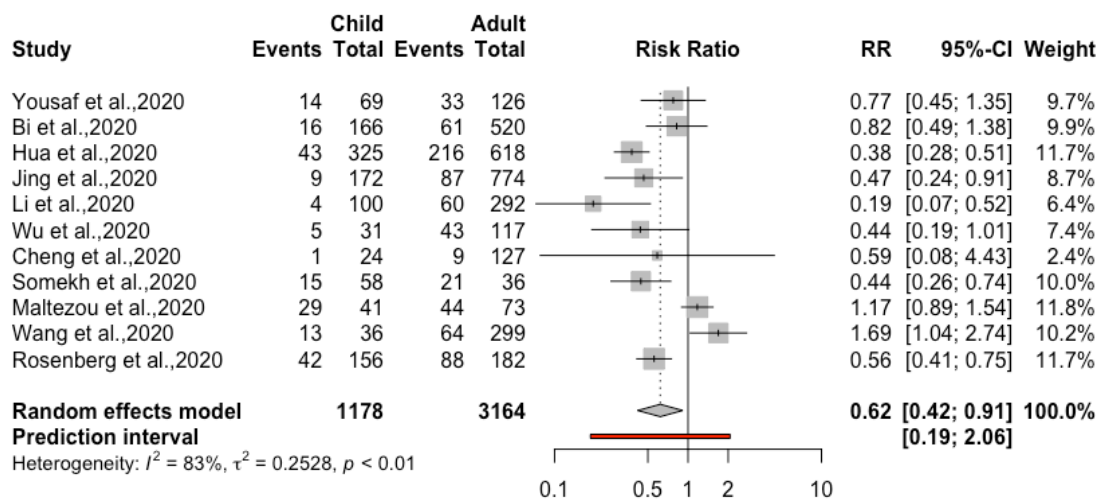

651

652 **Figure 3. Relative risk (RR) for the secondary attack rate of children and adults in**  
 653 **household SARS-CoV-2 transmission clusters.** Events describe the number of SARS-CoV-  
 654 2 positive individuals identified in the study.

655



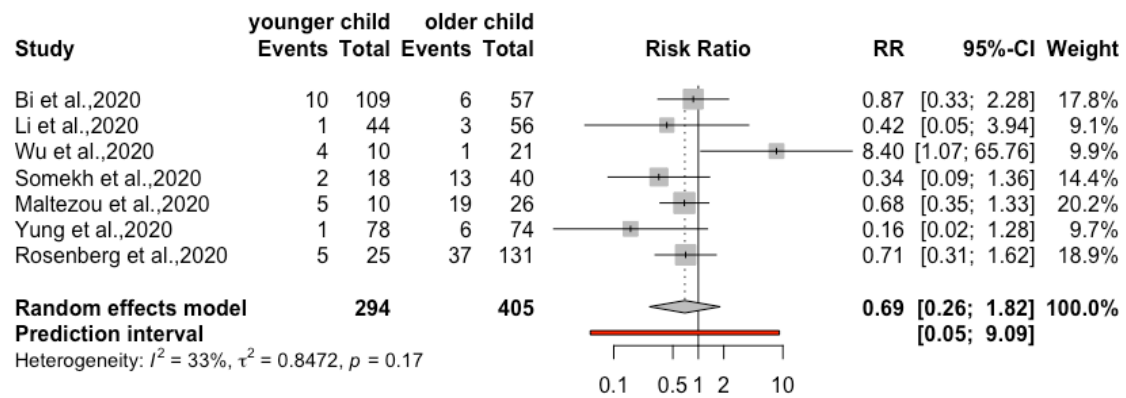

656

657 **Figure 4. Relative risk (RR) for the secondary attack rate of younger and older children**  
 658 **in household SARS-CoV-2 transmission clusters.** Events describe the number of SARS-  
 659 CoV-2 positive individuals identified in the study.

660
